# Supplementary material for: Competitive organelle-specific adaptors recruit Vps13 to membrane contact sites
Source: PubMed Central journal article supplement — J Cell Biol. 2018 Oct 1;217(10):3593–607. doi: 10.1083/jcb.201804111 (PMC6168272; doi:10.1083/jcb.201804111), 2018-10-01
Supplement: JCB_201804111_sm.pdf [file JCB_201804111_sm.pdf]

## Supplemental material

Bean et al., <https://doi.org/10.1083/jcb.201804111>

Table S1 is a separate Excel file showing Ypt35 and Spo71 FIMO hits.

Table S2 is a separate Excel file showing strains (A), plasmids (B), and primers (C) used in this study.

## Reference

Biegert, A., and J. Söding. 2008. De novo identification of highly diverged protein repeats by probabilistic consistency. *Bioinformatics*. 24:807–814. <https://doi.org/10.1093/bioinformatics/btn039>

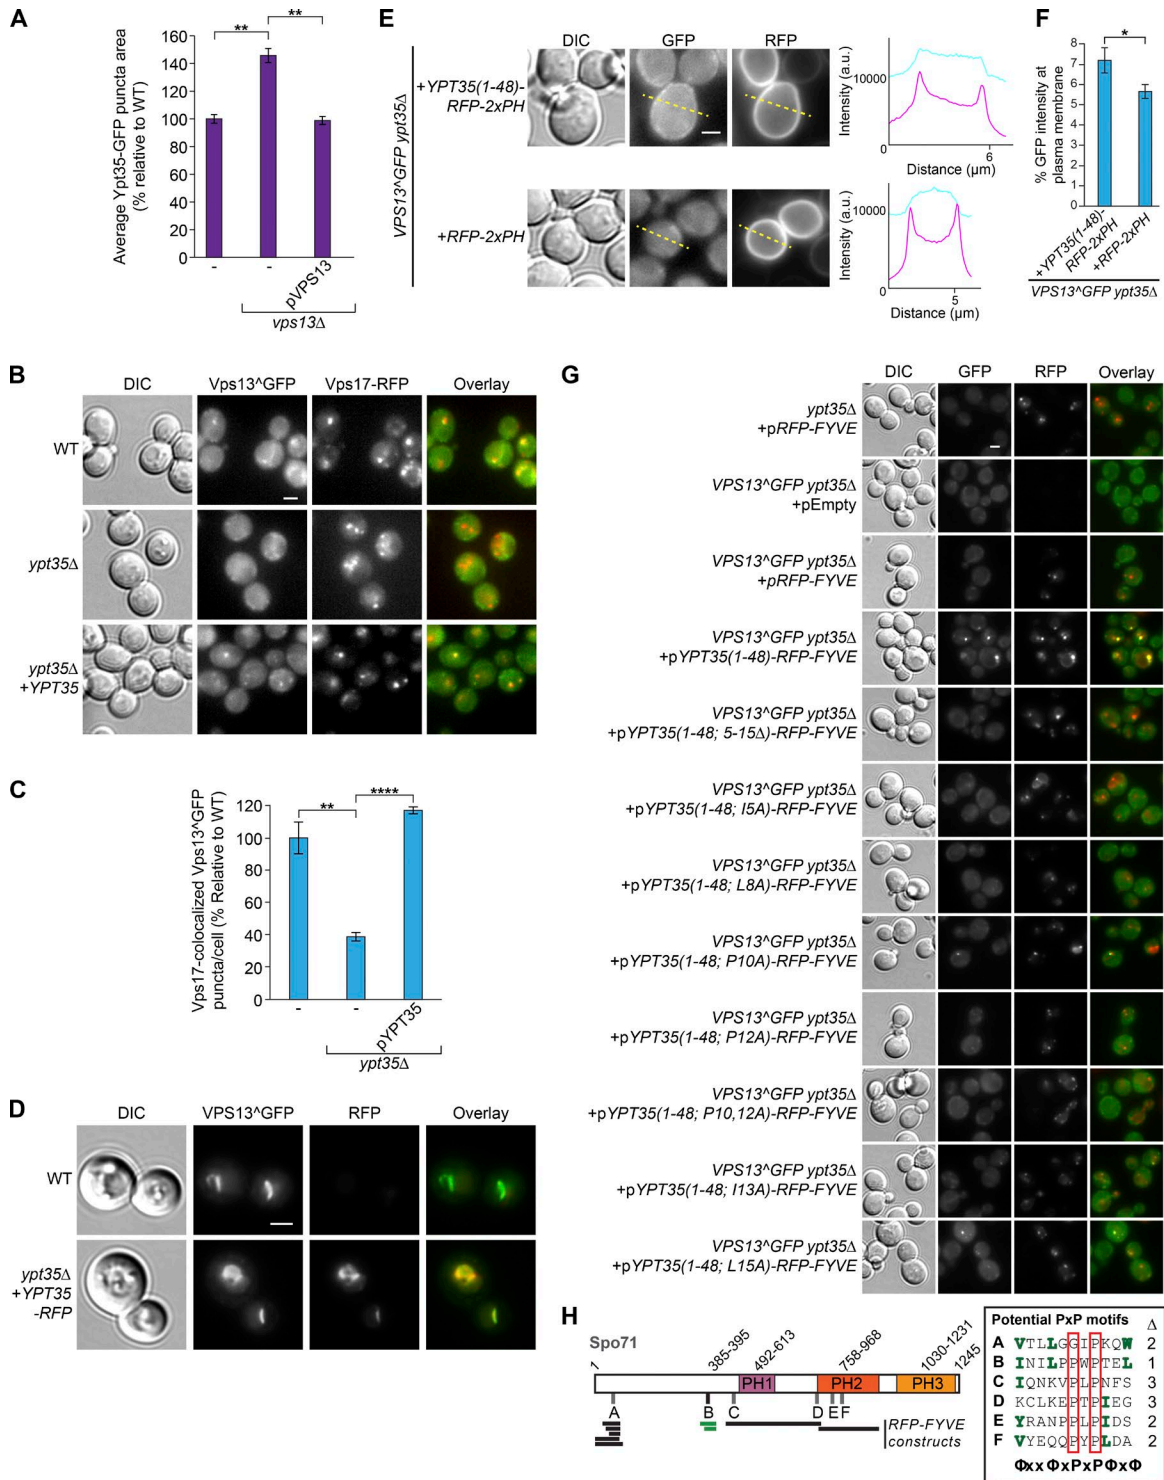

Figure S1. **Additional measures of Vps13 and Ypt35 localization.** (A) Loss of *VPS13* causes an increase in the area of Ypt35 puncta. Two-tailed equal variance *t* test;  $n = 3$ , cells/strain/replicate  $\geq 1,047$ ; \*\*,  $P < 0.01$ . (B) Vps13<sup>GFP</sup> is dependent on Ypt35 for localization to Vps17-RFP labeled endosomes. (C) Quantitation of Vps13<sup>GFP</sup> puncta that colocalize with Vps17-RFP. Two-tailed equal variance *t* test;  $n = 3$ , cells/strain/replicate  $\geq 1,910$ ; \*\*,  $P < 0.01$ ; \*\*\*\*,  $P < 0.0001$ . (D) Vps13<sup>GFP</sup> colocalizes with Ypt35-RFP at NVJs. (E) Ypt35(1–48)-RFP-2xPH<sub>PLCΔ</sub> recruits Vps13<sup>GFP</sup> to the plasma membrane. Line scans indicate the intensity of GFP (cyan) and RFP (magenta) signals along the dashed line. (F) Quantitation of Vps13<sup>GFP</sup> recruitment to the plasma membrane, measured as the percent of the total cell intensity colocalizing with the RFP construct at the plasma membrane. Two-tailed paired *t* test;  $n = 4$ ,  $\geq 1,775$  cells/strain/replicate; \*,  $P < 0.05$ . (G) All Ypt35(1–48)-RFP-FYVE constructs were expressed and localized to the vacuolar rim/puncta, and in cases where Vps13<sup>GFP</sup> was recruited to puncta, the tagged proteins colocalized. DIC, differential interference contrast. (H) A schematic of Spo71 showing the locations of potential PxP Vps13-interaction motifs with partial matches to the consensus  $\Phi x x \Phi x P \Phi x \Phi$ , where  $\Phi$  is a hydrophobic residue. The number of deviations from the consensus for each potential motif is indicated under  $\Delta$ . Regions chosen for RFP-FYVE constructs are indicated by bars below; constructs indicated by green or black bars respectively did or did not promote formation of colocalizing Vps13<sup>GFP</sup> puncta. Bars, 2  $\mu$ m. Error bars indicate SEM.

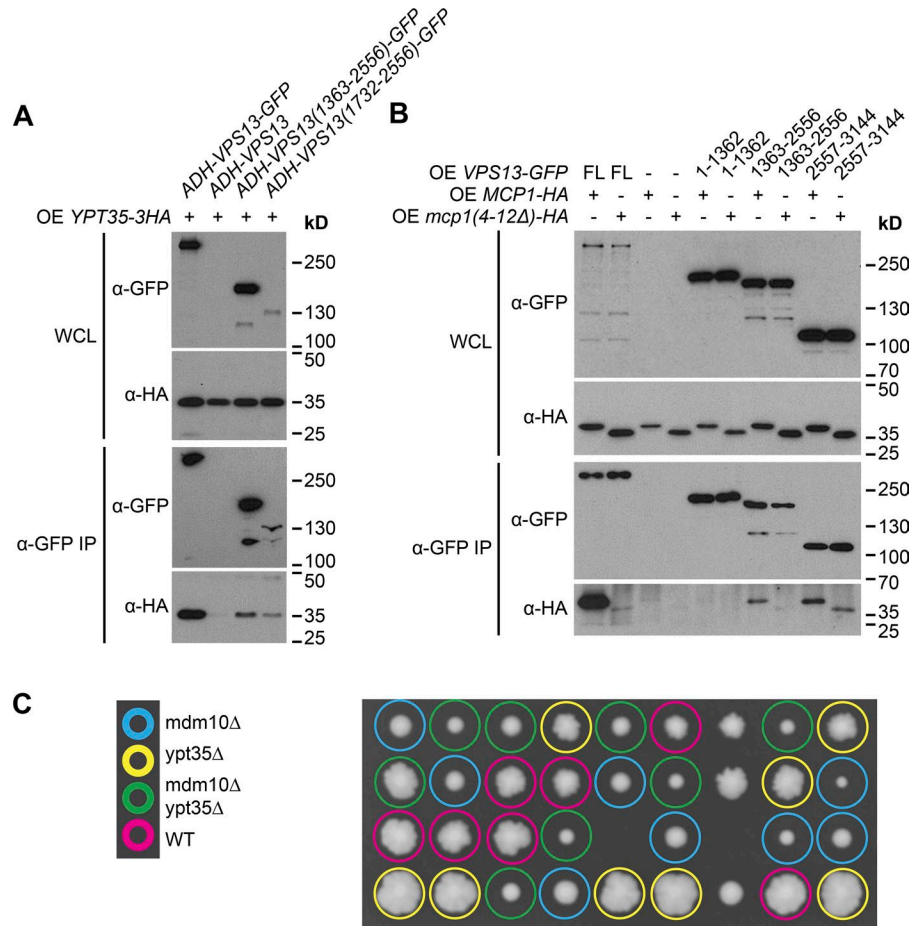

Figure S2. **Additional assessments of Vps13 adaptor interactions.** (A) Ypt35-3HA binds the minimal DUF1162-containing Vps13(1,732–2,556)-GFP fragment. *ADH1pr*-driven WT or truncated Vps13-GFP was immunopurified, and coprecipitating *ADH1pr*-expressed Ypt35-3HA was detected by immunoblot. (B) Mcp1-3HA interacts with DUF1162-containing Vps13 fragments but not a C-terminal fragment in a PxP motif-dependent manner. *ADH1pr*-driven Vps13-GFP was immunopurified, and coprecipitating WT or mutant *ADH1pr*-overexpressed Mcp1-3HA was detected. IP, immunoprecipitation; WCL, whole-cell lysate. (C) Tetrad dissections of an *mdm10Δ* × *ypt35Δ* cross show the *mdm10Δ* and *ypt35Δ* mutations do not exhibit synthetic lethality.

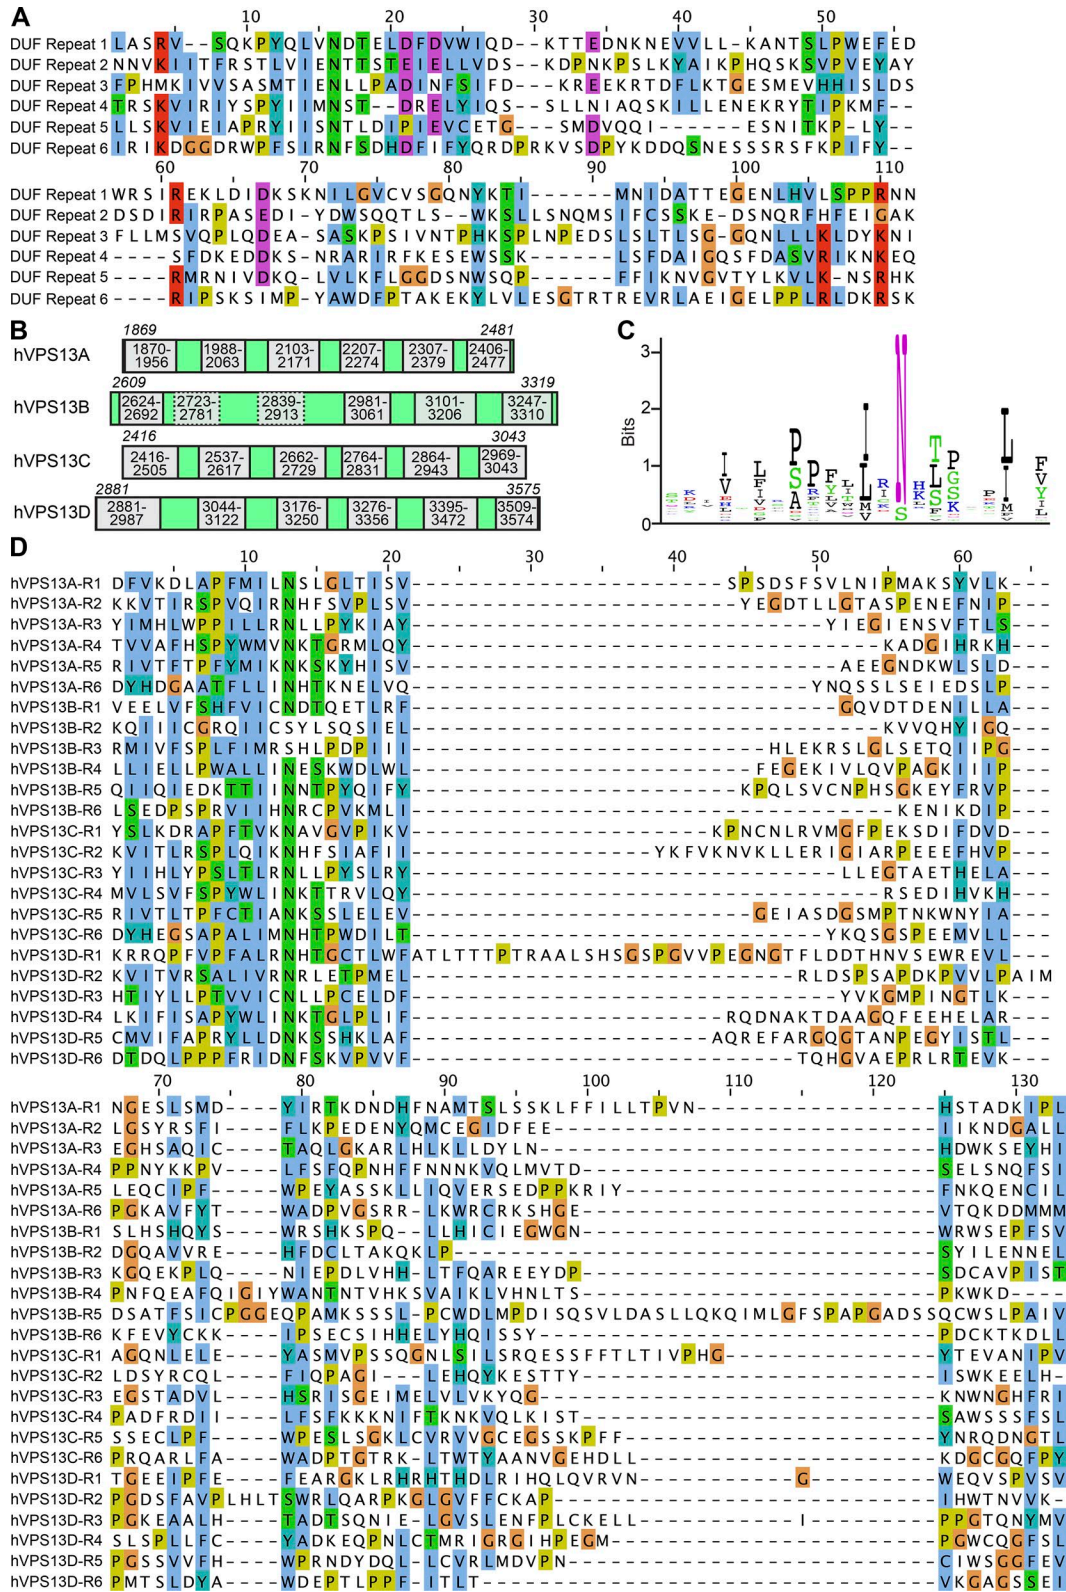

Figure S3. Complete alignments of Vps13 DUF1162 repeats. (A) Alignment of the six *S. cerevisiae* DUF1162 repeats identified by HHrepID (Biegert and Söding, 2008). (B) DUF1162 repeats identified by HHrepID in the four *Homo sapiens* VPS13 proteins. Dotted boxes indicate repeats lacking an otherwise invariant asparagine residue. (C) WebLogo of the conserved N-terminal region of all 24 human DUF1162 repeats. (D) Alignment of the 24 *H. sapiens* DUF1162 repeats in VPS13A/B/C/D.
